# Supplementary material
Source: publisher site journal article supplement (https://www.dovepress.com/article/152002)
Supplement: Supplementary file 1 [file get_supplementary_file.php]

## Supporting Information

### Dual-responsive dithio-polydopamine coated porous CeO<sub>2</sub> nanorods for targeted and synergistic drug delivery

Ying Zhang,<sup>1</sup> ‡ Xiaowen Wu,<sup>1</sup> ‡ Chenxi Hou,<sup>1</sup> Kun Shang,<sup>1</sup> Kui Yang,<sup>1</sup> Zhimin Tian,<sup>2</sup>  
Zhichao Pei,<sup>1</sup> Yongquan Qu,<sup>2</sup> Yuxin Pei<sup>1</sup> \*

<sup>1</sup>shaanxi Key laboratory of Natural Products & chemical Biology, college of chemistry and Pharmacy, Northwest a&F University, Yangling, shaanxi, People's republic of china; <sup>2</sup>center for applied chemical research, Frontier Institute of science and Technology, Xi'an Jiaotong University, Xi'an, People's republic of china

\*These authors contributed equally to this work

|                                                                |           |
|----------------------------------------------------------------|-----------|
| <b>1. Materials and methods .....</b>                          | <b>2</b>  |
| <b>2. Synthesis and characterization of the compounds.....</b> | <b>2</b>  |
| <b>2. FT-IR of the DDS .....</b>                               | <b>10</b> |
| <b>3. Analysis of Lac-PDS/CeONRs by DLS and SEM.....</b>       | <b>11</b> |
| <b>4. DOX loading and release .....</b>                        | <b>12</b> |
| <b>5. Analysis of CeONRs by Zeta potential and BET. ....</b>   | <b>12</b> |
| <b>6. Cytotoxicity evaluation.....</b>                         | <b>14</b> |
| <b>7. Confocal laser scanning microscopy (CLSM) .....</b>      | <b>15</b> |
| <b>8. TEM image .....</b>                                      | <b>15</b> |
| <b>9. Reference .....</b>                                      | <b>15</b> |

## 1. Materials and methods

All reagents were purchased from commercial suppliers and used without further purification unless specified. Water used in this work was triple distilled.

## 2. Synthesis and characterization of the compounds

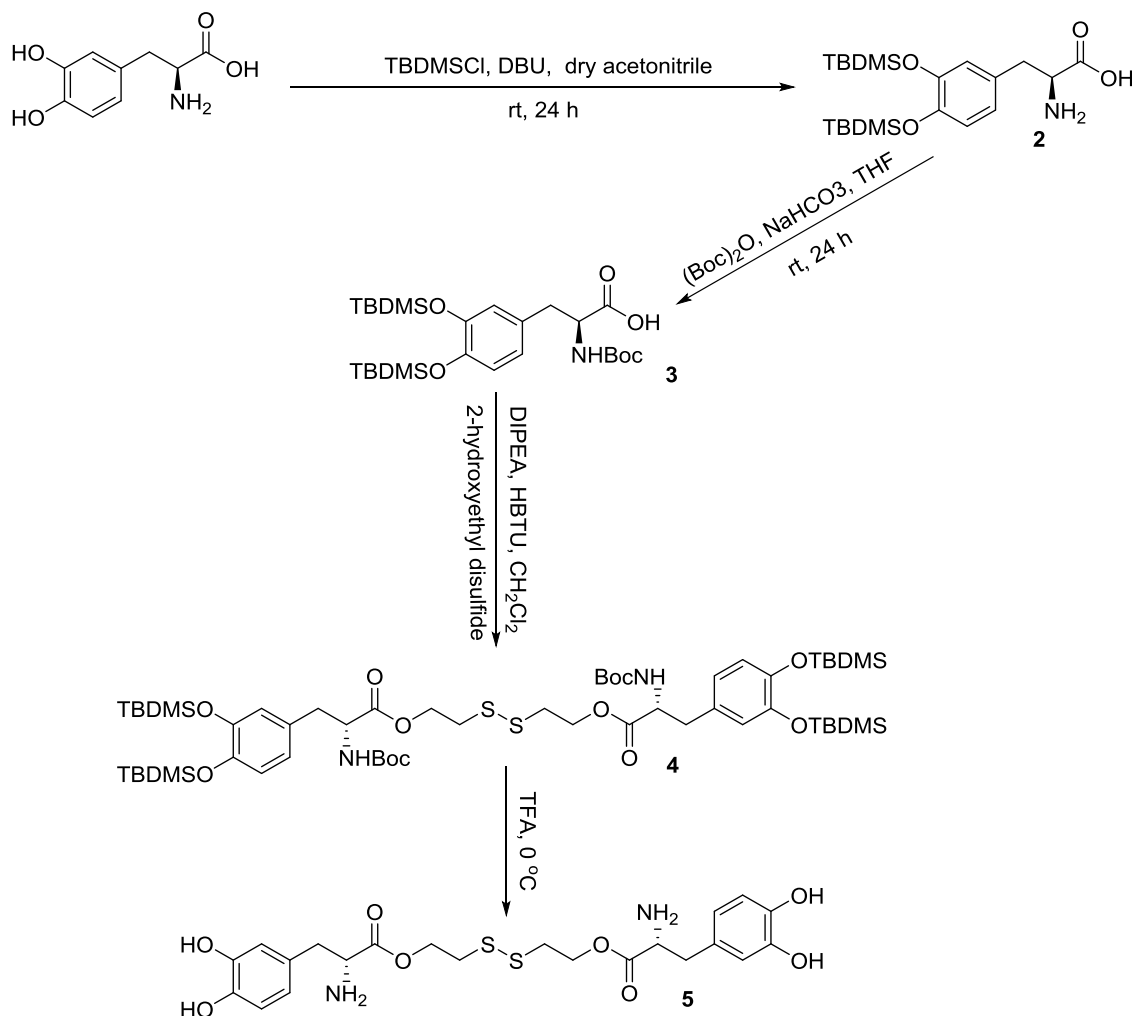

**Scheme S1.** Synthetic route of **DOPASS (5)**.

### Synthesis of **DOPASS (5)**:

Compound **2**: L-DOPA (274.5 mg, 1.39 mmol) and TBDMSCl (638 mg, 4.23 mmol) were dissolved in dry acetonitrile (2.0 mL), and to the acetonitrile solution was cooled to  $0^\circ\text{C}$ , and DBU (602.8 mg, 4 mmol) was added dropwise over 10 min. The mixture

solution was stirred for 24 h at room temperature. The solution was subsequently filtered. The precipitate was recrystallized from methanol/acetonitrile to give pure **2** (425.7 mg, 81 %).  $^1\text{H}$  NMR (500 MHz, MeOD)  $\delta$  6.84 (dd,  $J = 14.0, 5.0$  Hz, 2H), 6.77 (dd,  $J = 8.1, 1.9$  Hz, 1H), 3.69 (dd,  $J = 9.0, 4.0$  Hz, 1H), 3.21 (dd,  $J = 14.7, 3.9$  Hz, 1H), 2.86 (dd,  $J = 14.6, 9.1$  Hz, 1H), 1.01 (d,  $J = 4.6$  Hz, 18H), 0.23 (d,  $J = 2.2$  Hz, 6H), 0.20 (s, 6H) ppm.<sup>1</sup>

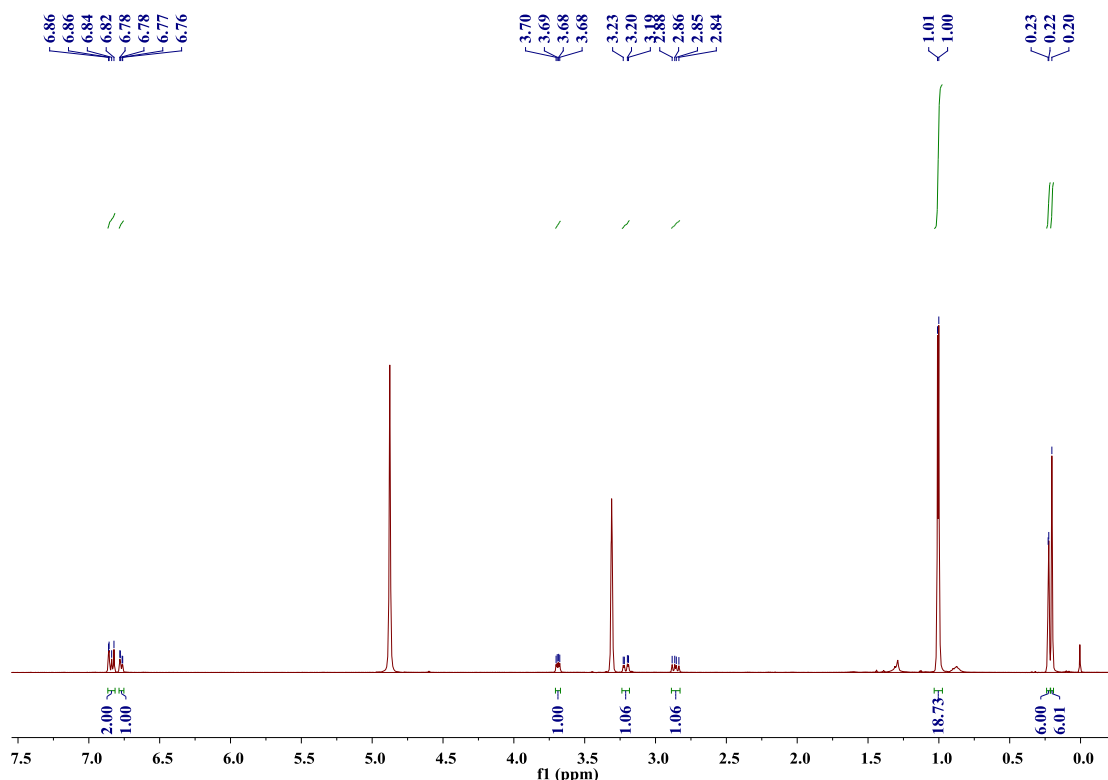

**Figure S1.**  $^1\text{H}$  NMR spectrum (500 MHz, MeOD) of **2**.

**Compound 3:** Compound **2** was added in 1 mL of deionized water containing  $\text{NaHCO}_3$  (15.5 mg, 0.18 mmol). The solution of di-*tert*-butyl dicarbonate in 1 mL of tetrahydrofuran was added to the suspension. The reaction mixture was stirred for 24 h at room temperature, then tetrahydrofuran was evaporated, then water was added to the residue and the solution extracted with diethyl ether. The aqueous layer was acidified with citric acid to pH = 5-6 and extracted three times with ethyl acetate. The organic phase was dried with  $\text{MgSO}_4$  and concentrated under reduced pressure. The crude product was purified by flash column chromatography (eluent: ethyl acetate/hexane = 1:2) to give **3** as a yellow oil (66 mg, 74 %).  $^1\text{H}$  NMR (500 MHz,

MeOD)  $\delta$  6.76 (t,  $J = 5.3$  Hz, 2H), 6.69 (d,  $J = 8.1$  Hz, 1H), 4.29 (dd,  $J = 8.2, 4.9$  Hz, 1H), 3.02 (dd,  $J = 13.9, 4.8$  Hz, 1H), 2.80 (dd,  $J = 13.8, 8.7$  Hz, 1H), 1.40 (s, 9H), 0.99 (d,  $J = 6.2$  Hz, 18H), 0.21 (d,  $J = 1.8$  Hz, 6H), 0.18 (s, 6H) ppm.<sup>2</sup>

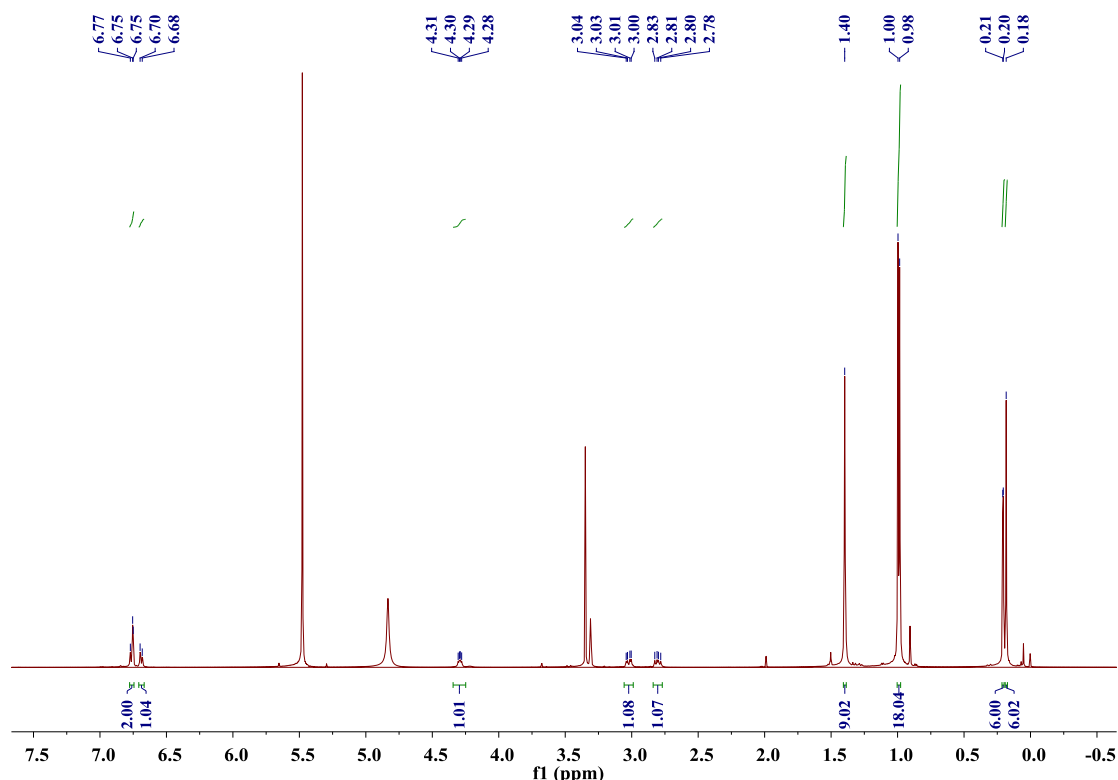

**Figure S2.** <sup>1</sup>H NMR spectrum (500 MHz, MeOD) of **3**.

Compound **4**: 2-Hydroxyethyl disulfide (7.0 mg, 0.045 mmol) and the compound **3** (52.4 mg, 0.1 mmol) were dissolved in dry dichloromethane, and to the solution was added HBTU (60 mg, 0.16 mmol). The mixture was cooled to 0 °C, and DIPEA (319  $\mu$ L, 0.18 mmol) was added dropwise over 10 min. The resulting mixture was stirred at room temperature for 15 h, followed by brine wash. The organic phase was separated, and the aqueous phase was extracted with dichloromethane. The combined organic phase was dried over MgSO<sub>4</sub>. The organic layer was concentrated under reduced pressure and purified by silica-gel column chromatography (ethyl acetate/hexane = 1:20) to give 67 mg (57 %) of **4**. <sup>1</sup>H NMR (500 MHz, CDCl<sub>3</sub>)  $\delta$  6.73 (d,  $J = 8.1$  Hz, 2H), 6.62 (s, 2H), 6.56 (d,  $J = 7.9$  Hz, 2H), 4.94 (d,  $J = 7.4$  Hz, 2H), 4.51 (d,  $J = 6.0$  Hz, 2H), 4.35 (d,  $J = 2.4$  Hz, 4H), 2.96 (m,  $J = 29.9, 13.8, 6.1$  Hz, 4H), 2.87 (t,  $J = 6.6$  Hz, 4H), 1.42 (s, 18H), 0.98 (d,  $J = 5.1$  Hz, 36H), 0.19 (d,  $J = 1.7$  Hz, 12H), 0.18 (s,

12H) ppm.<sup>2</sup>

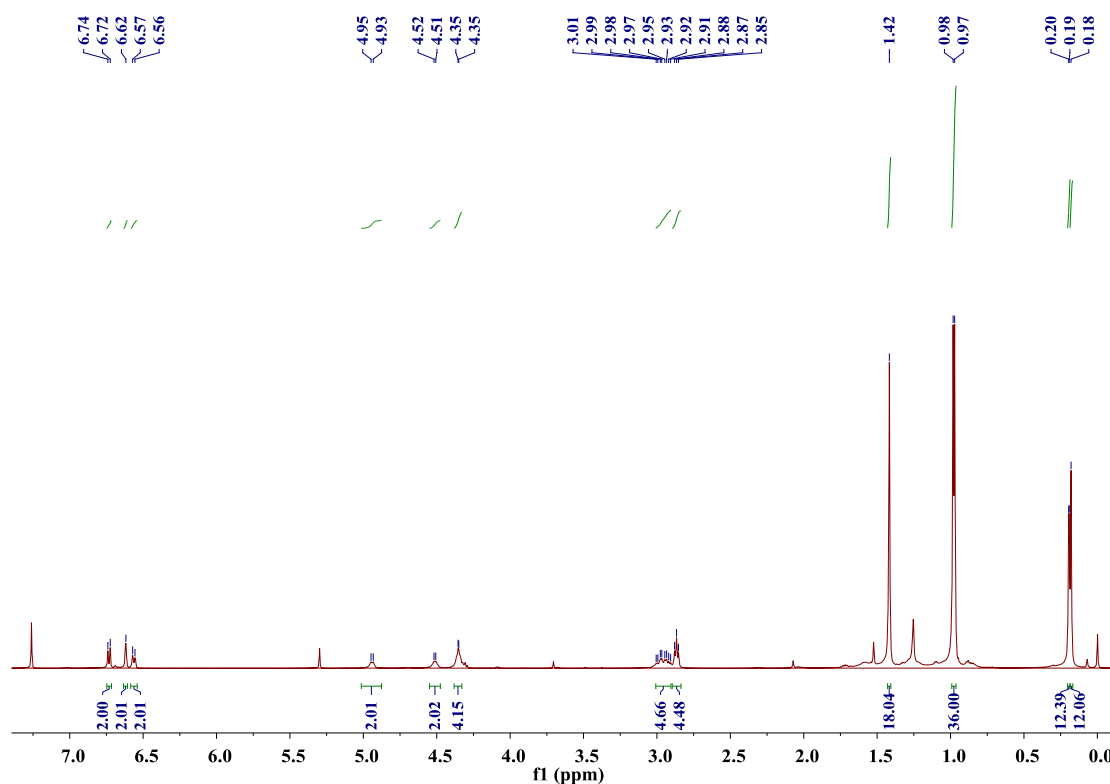

**Figure S3.** <sup>1</sup>H NMR spectrum (500 MHz, CDCl<sub>3</sub>) of **4**.

Compound **5** (DOPASS): Compound **4** (65.5 mg, 0.06 mmol) was added in THF (5 mL) at 0 °C for 60 min, and then was stirred for 24 h at room temperature. The solution was concentrated under reduced pressure. The crude was recrystallized from dry diethyl ether to give **5** (20 mg, 70 %). <sup>1</sup>H NMR (500 MHz, DMSO) δ 8.40 (s, 2H), 6.67 (d, *J* = 8.0 Hz, 2H), 6.60 (t, *J* = 1.8 Hz, 2H), 6.46 (dd, *J* = 8.0, 1.8 Hz, 2H), 4.44 – 4.29 (m, 2H), 4.18 (s, 2H), 3.02 – 2.84 (m, 8H) ppm.<sup>2</sup>

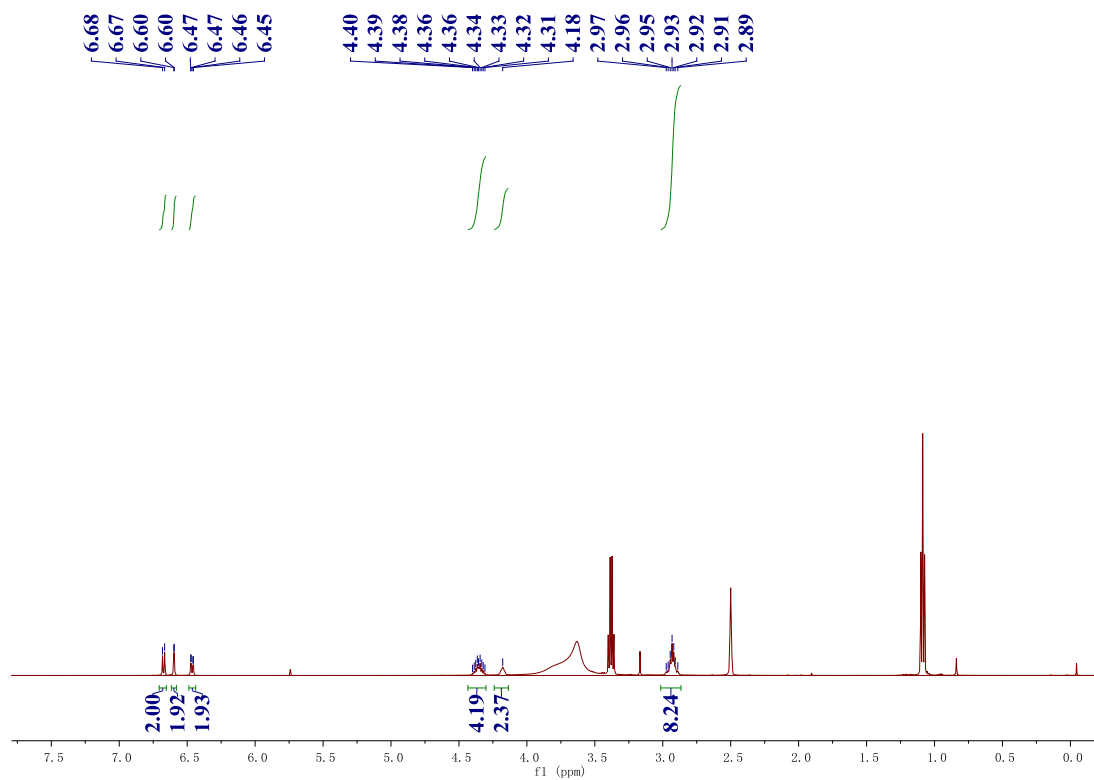

**Figure S4.**  $^1\text{H}$  NMR spectrum (500 MHz, DMSO) of **5**.

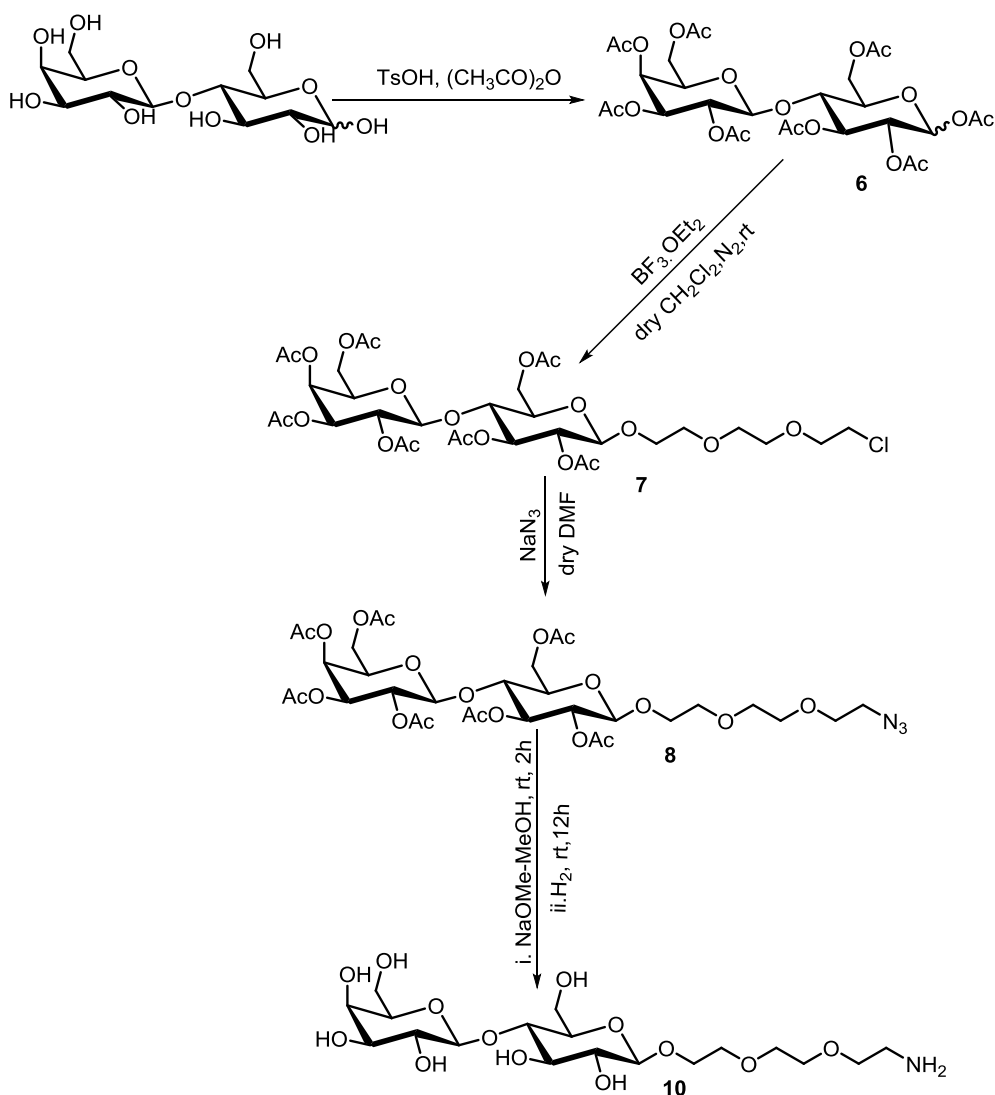

**Scheme S2.** Synthetic route of **10** (Lac-NH<sub>2</sub>).

Compound **7**: To a solution of compound **6** (2.7 g, 4.0 mmol) in dry CH<sub>2</sub>Cl<sub>2</sub> (20 mL) was added freshly activated 3 Å molecular sieves (1.0 g) and 2-[2-(2-chloroethoxy)ethoxy]ethanol (1 g, 0.86 mL, 5.9 mmol) at room temperature for 1 h under N<sub>2</sub> atmosphere. The reaction mixture was cooled at 0 °C, and BF<sub>3</sub>·OEt<sub>2</sub> (2.0 mL) was added. The reaction mixture was stirred at 0 °C for 24 h, and filtered over a Celite bed. The filtrate was diluted with EtOAc, and the organic layer was washed with saturation NaHCO<sub>3</sub> and saturation NaCl, dried over MgSO<sub>4</sub>, and concentrated. The residue was purified by silica-gel column chromatography (ethyl acetate/hexane = 3:2) to give **7** (1.7 g, 56%).<sup>3</sup>

Compound **8**: Compound **7** (1.5 g, 1.9 mmol) was added to a suspension of NaN<sub>3</sub> (0.6

g, 9.2 mmol) in dry DMF (15 mL) at 80 °C for 16 h. The reaction mixture was concentrated in vacuo, and the residue was diluted with CHCl<sub>3</sub>. The organic layer was washed with H<sub>2</sub>O and brine, dried over MgSO<sub>4</sub>, filtered, and concentrated. The residue was purified by silica-gel column chromatography (ethyl acetate/hexane = 3:1) to give **8** (1.0 g, 68%). <sup>1</sup>H NMR (500 MHz, CDCl<sub>3</sub>) δ 5.34 (d, J = 2.5 Hz, 1H), 5.18 (t, J = 9.3 Hz, 1H), 5.09 (dd, J = 10.3, 8.0 Hz, 1H), 4.91 (ddd, J = 17.5, 9.9, 5.8 Hz, 2H), 4.56 (d, J = 7.9 Hz, 1H), 4.51–4.43 (m, 2H), 4.14–4.04 (m, 3H), 3.88 (ddd, J = 18.6, 11.4, 5.5 Hz, 2H), 3.78 (t, J = 9.4 Hz, 1H), 3.68–3.64 (m, 6H), 3.64–3.60 (m, 6H), 2.14 (s, 3H), 2.11 (s, 3H), 2.07–2.01 (m, 12H), 1.95 (s, 3H) ppm.<sup>3</sup>

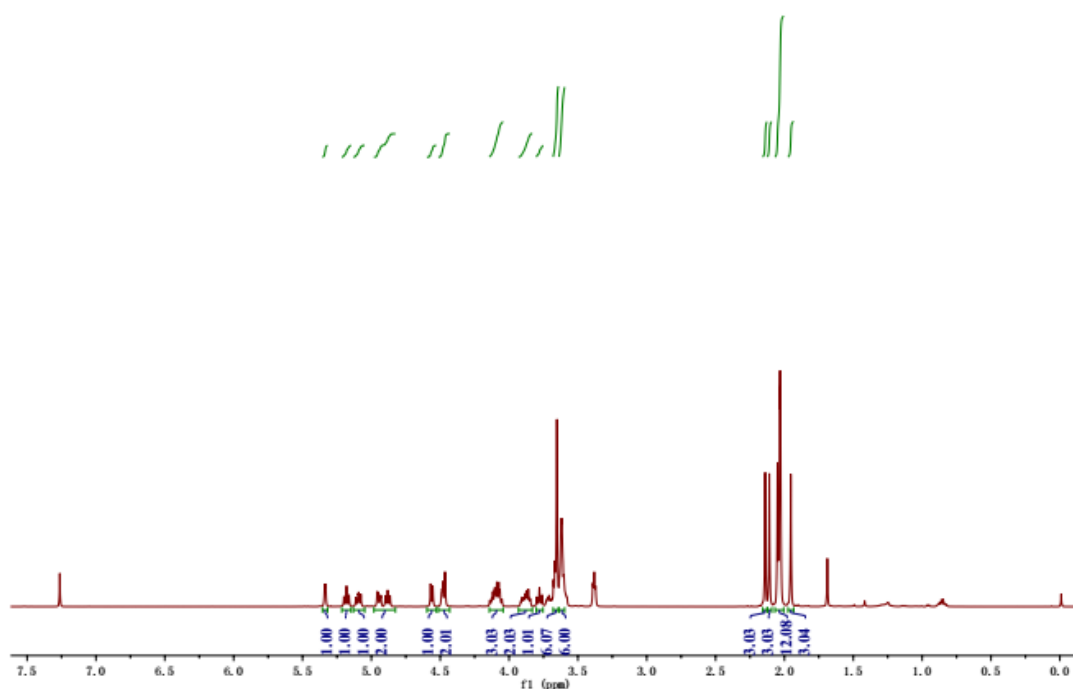

**Figure S5.** <sup>1</sup>H NMR spectrum (500 MHz, CDCl<sub>3</sub>) of **8**.

**Compound 9:** Compound **8** (1.0 g, 1.3 mmol) was deacetylated with a catalytic amount of NaOMe in MeOH (15 mL) to give **9** as a colorless solid.<sup>3</sup>

**Compound 10 (Lac-NH<sub>2</sub>):** A mixture of **9** (200 mg, 0.40 mmol) and Pd/C (10 %, catalytic amount) in 20 mL CH<sub>3</sub>OH was stirred at room temperature under hydrogen atmosphere (100 psi) for 8h. The resulting mixture was filtered, and the filtrate was concentrated under reduced pressure to give **10** as a white solid (120 mg, 92 %). <sup>1</sup>H





## 2. FT-IR of the DDS

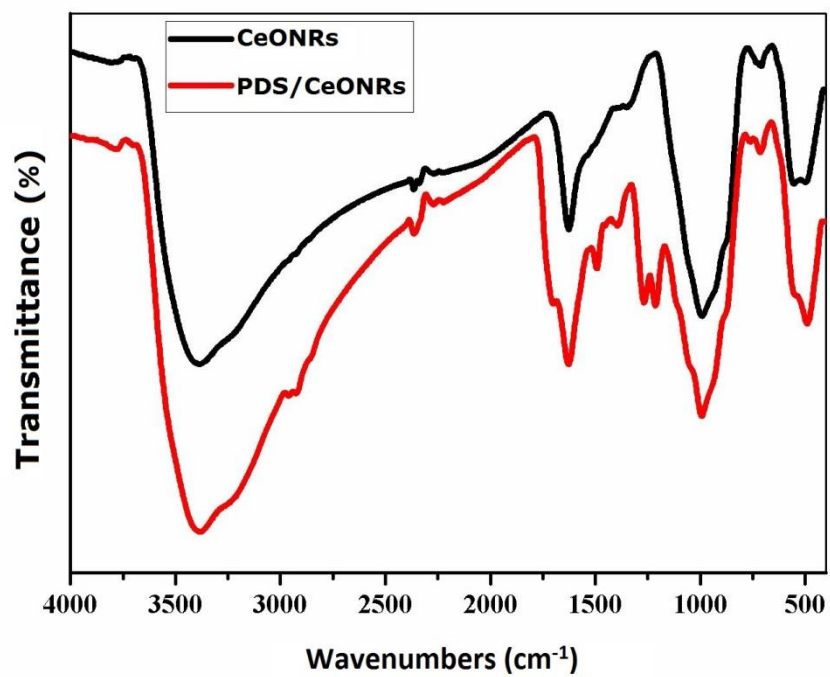

*Figure S7.* FT-IR spectroscopy of CeONRs and PDS/CeONRs.

### 3. Analysis of Lac-PDS/CeONRs by DLS and SEM.

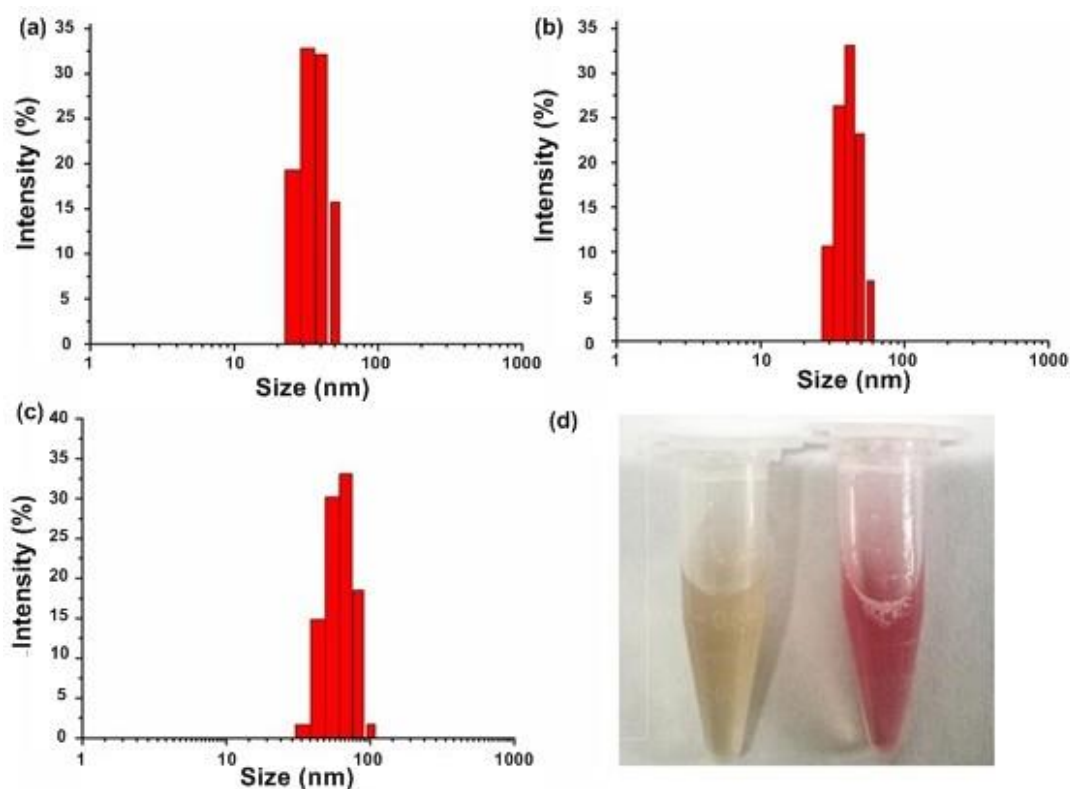

**Figure S8.** DLS analysis, (a) CeONRs; (b) PDS/CeONRs; (c) Lac-PDS/CeONRs; Digital photos of Lac-PDS/ CeONRs dispersions in PBS buffer and RPMI 1640 culture medium containing 10% FBS for at least 1 day (d).

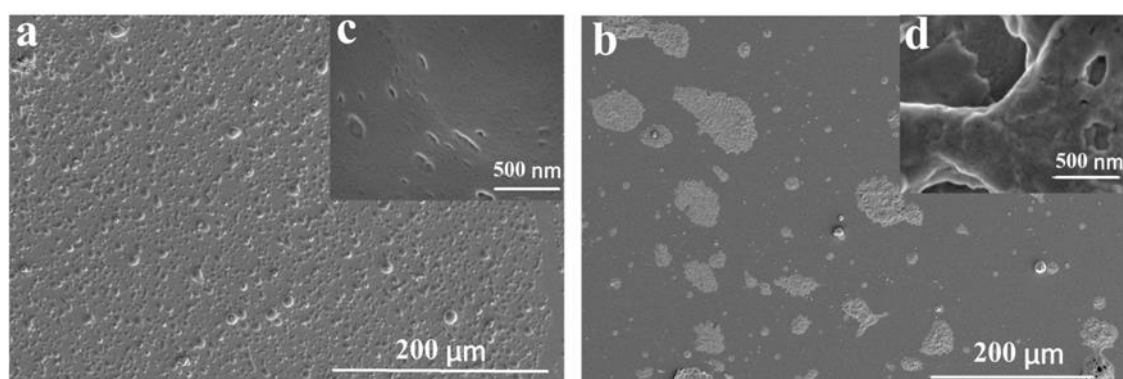

**Figure S9.** (a) SEM images of the PDS coated silicon slice surface; the inset shows an enlargement of the image; (b) the PDS coated silicon slice surface after being treated with 10 mM GSH for 4 h. The enlarged images of box (c, d).

#### 4. DOX loading and release

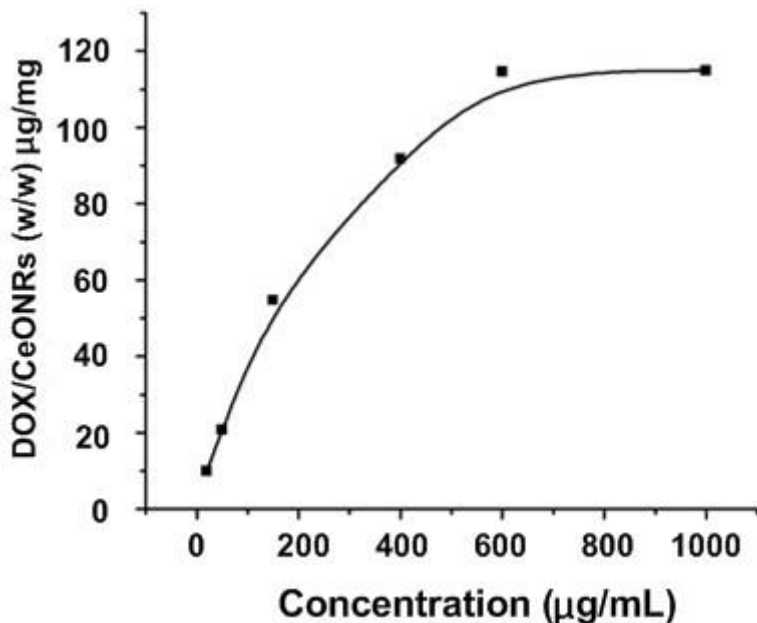

**Figure S10.** Profile of DOX loading CeONRs

In vitro drug release from DOX-loaded CeONRs was detected as described previously. 10 mg freeze-dried DOX@CeONRs was dispersed in 1 mL of PBS. Then the dispersion was transferred into a dialysis bag (MWCO = 3500), and the bag was submerged in 10 mL PBS of different pH values (7.4, 5.0) and GSH (2.5 mM, 10.0 mM), respectively, and stirred at 37 °C. At specified time intervals, the concentration of DOX was determined by UV-Vis spectrophotometry. The cumulative release of DOX from Lac-PDS/DOX@CeONRs was also prepared by the same procedure.

#### 5. Analysis of CeONRs by Zeta potential and BET.

**Table S1.** The Zeta potential of NPs

| Sample         | $\zeta$ potential (mV) |
|----------------|------------------------|
| CeONRs         | $-1.84 \pm 0.35$       |
| PDS/CeONRs     | $-8.29 \pm 0.43$       |
| Lac-PDS/CeONRs | $-14.64 \pm 0.17$      |

**Table S2.** BET data for the surface, pore volume and pore size

| BET surface (m <sup>2</sup> /g) | Pore volume (cm <sup>3</sup> /g) | Pore size (nm) |
|---------------------------------|----------------------------------|----------------|
| 104.41                          | 0.36                             | 11.98          |

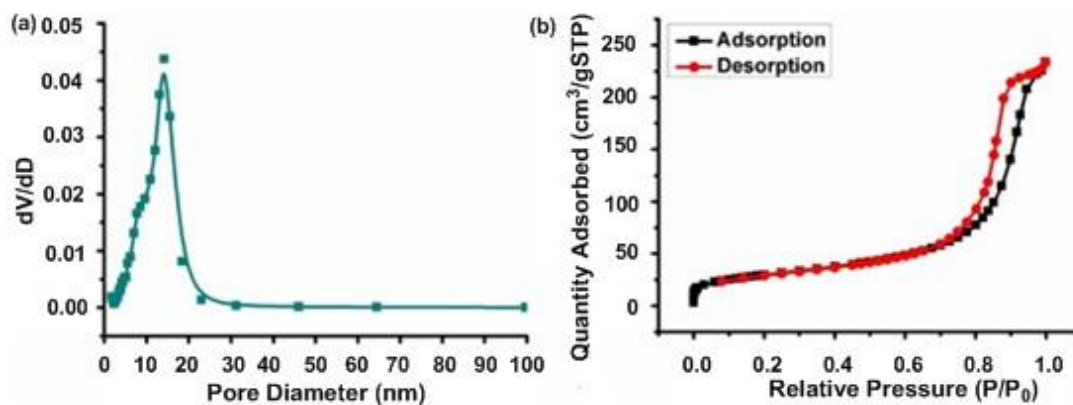

**Figure S11.** (a) Pore size distribution of CeONRs; (b) N<sub>2</sub> adsorption-desorption isotherms of the CeONRs.

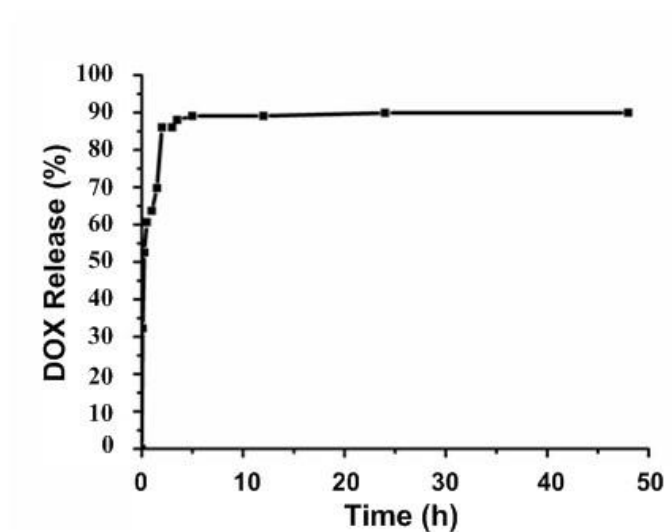

**Figure S12.** DOX release profile of CeONRs in PBS

## 6. Cytotoxicity evaluation

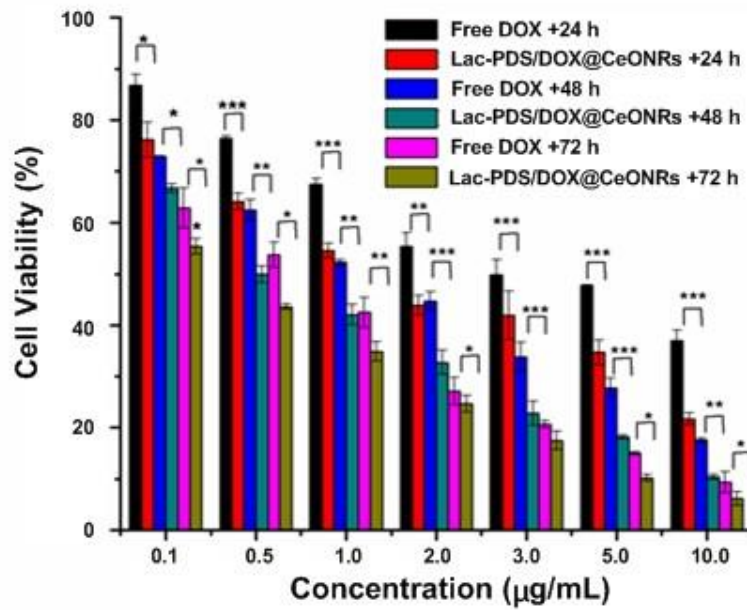

**Figure S13.** Cell viability of HepG2 cells incubated with Lac-PDS/DOX@CeONRs and Free DOX at different concentrations for 24 h, 48 h, 72 h. (\*\*\*:  $p < 0.001$ , \*\*:  $p < 0.01$ ; \*:  $p < 0.5$ ).

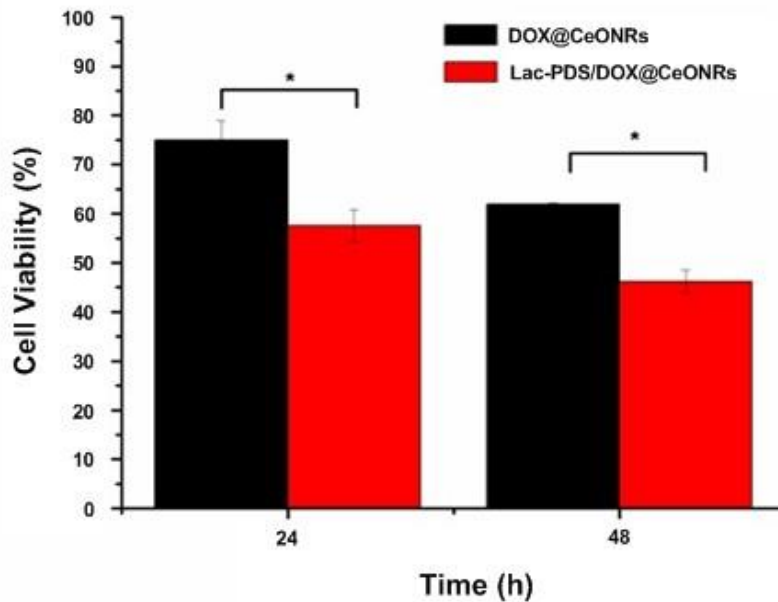

**Figure S14.** Cell viability of HepG2 cells incubated with Lac-PDS/DOX@CeONRs and DOX@CeONRs at different concentrations for 24 h, 48 h and the DOX concentration is 1 µg/mL. (\*:  $p < 0.5$ )

## 7. Confocal laser scanning microscopy (CLSM)

HepG2 cells were seeded in 35 mm plastic bottomed  $\mu$ -dishes for 24 h, and then the medium was replaced with a fresh one. The cells were then incubated with Lac-PDS/DOX@CeONRs for 4 h at the concentration of 5  $\mu$ M. The dishes were then washed with PBS for three times. Thereafter, the cells were stained with DAPI for 15 min. Finally, the cells were washed with PBS and then observed under a confocal fluorescence microscope (OLYMPUS FV1000).

## 8. TEM image

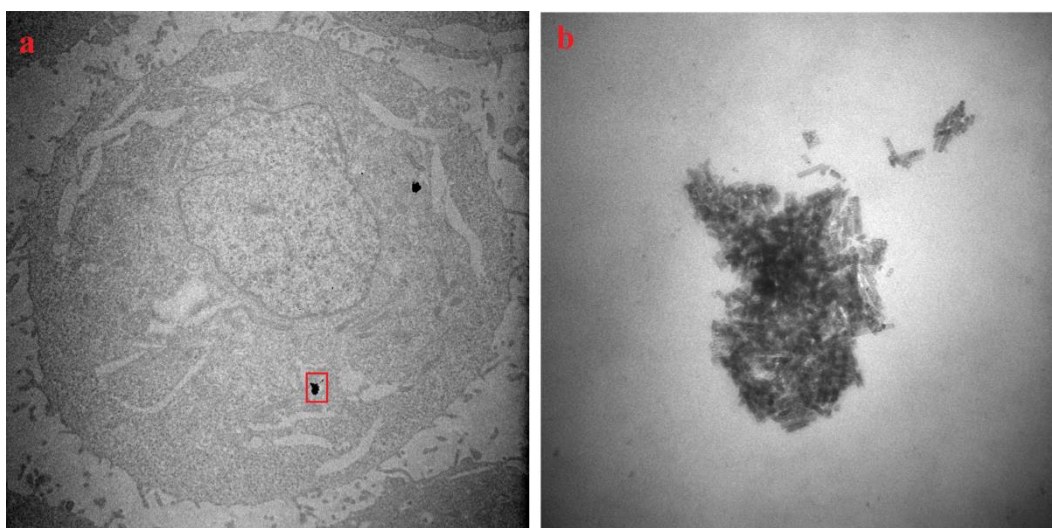

**Figure S15.** (a) TEM image of HepG2 incubated with CeONRs for 24 h; (b) Enlarged view of the marked area of panel a.

## 9. Reference

1. Nakonieczna L, Przychodzen W, Chimiak A. A new convenient route for the synthesis of DOPA peptides. *Liebigs Ann. Chem.* 1994(10):1055-1058.
2. Hong D, Lee H, Kim BJ, et al. A degradable polydopamine coating based on disulfide-exchange reaction. *Nanoscale.* 2015;7(47):20149-20154.
3. Kato H, Uzawa H, Nagatsuka T, et al. Preparation and evaluation of lactose-modified monoliths for the adsorption and decontamination of plant toxins and lectins. *Carbohydrate research.* 2011;346(13):1820-1826.
